# Supplementary material for: Effect of N-Terminal Peptide Modifications on In Vitro and In Vivo Properties of 177Lu-Labeled Peptide Analogs Targeting CCK2R
Source: MDPI journal article supplement (doi:10.3390/pharmaceutics15030796), 2023-02-28
Supplement: s1 [file s1]

## Table of content

**Figure S1.** UV-chromatograms of (a) DOTA-MGS5, (b) 1 and (c) 2 after HPLC purification.

**Figure S2.** Mass spectra of (a) DOTA-MGS5, (b) 1 and (c) 2 after HPLC purification.

**Figure S3.** Radiochromatograms of  $^{177}\text{Lu}$ -labeled (a) DOTA-MGS5, (b) 1 and (c) 2: reaction mixture after radiolabeling with minor presence ( $\leq 2\%$ ) of free lutetium-177 (solid line) and after removal of hydrophilic impurities by solid phase extraction (dashed line), respectively.

**Table S1.** Results of biodistribution studies evaluated in A431-CCK2R/A431-mock xenografted BALB/c nude mice of the  $^{177}\text{Lu}$ -labeled peptide derivatives ( $\sim 0.5$  MBq, 20 pmol, 4 h p.i.). Values expressed as percentage of injected activity per gram tissue (% IA/g); mean  $\pm$  SD (n=5).

**Table S2.** Results of the additional biodistribution study with 1000-fold excess of non-radiolabeled peptide (blocking experiment) in A431-CCK2R/A431-mock xenografted BALB/c nude mice of the  $^{177}\text{Lu}$ -labeled peptide derivatives ( $\sim 0.5$  MBq, 20 pmol, 4 h p.i.). Values expressed as percentage of injected activity per gram tissue (% IA/g; n=1).

**Figure S4.** Uptake of [ $^{177}\text{Lu}$ ]Lu-2 in different tissues dissected from A431-CCK2R xenografted BALB/c nude mice for up to 7 days after injection (n=5).

**Table S3.** Uptake values of [ $^{177}\text{Lu}$ ]Lu-2 in A431-CCK2R tumor xenograft for up to 7 days after injection (n=5).

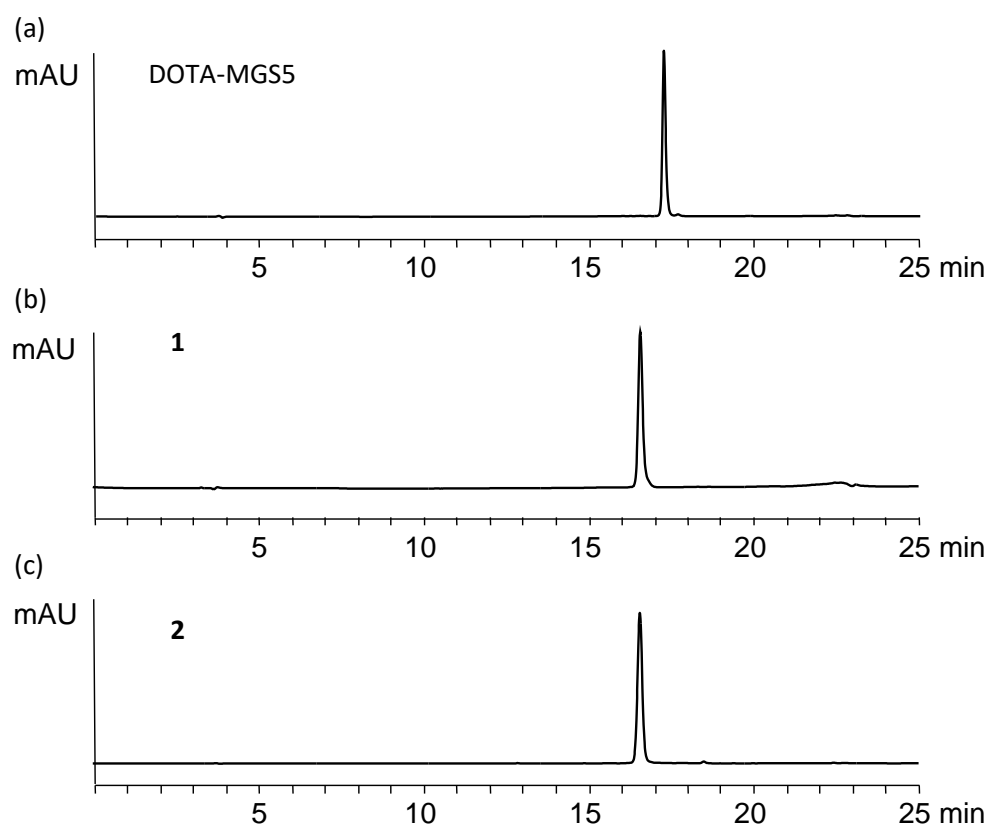

**Figure S1.** UV-chromatograms of (a) DOTA-MGS5, (b) **1** and (c) **2** after HPLC purification.

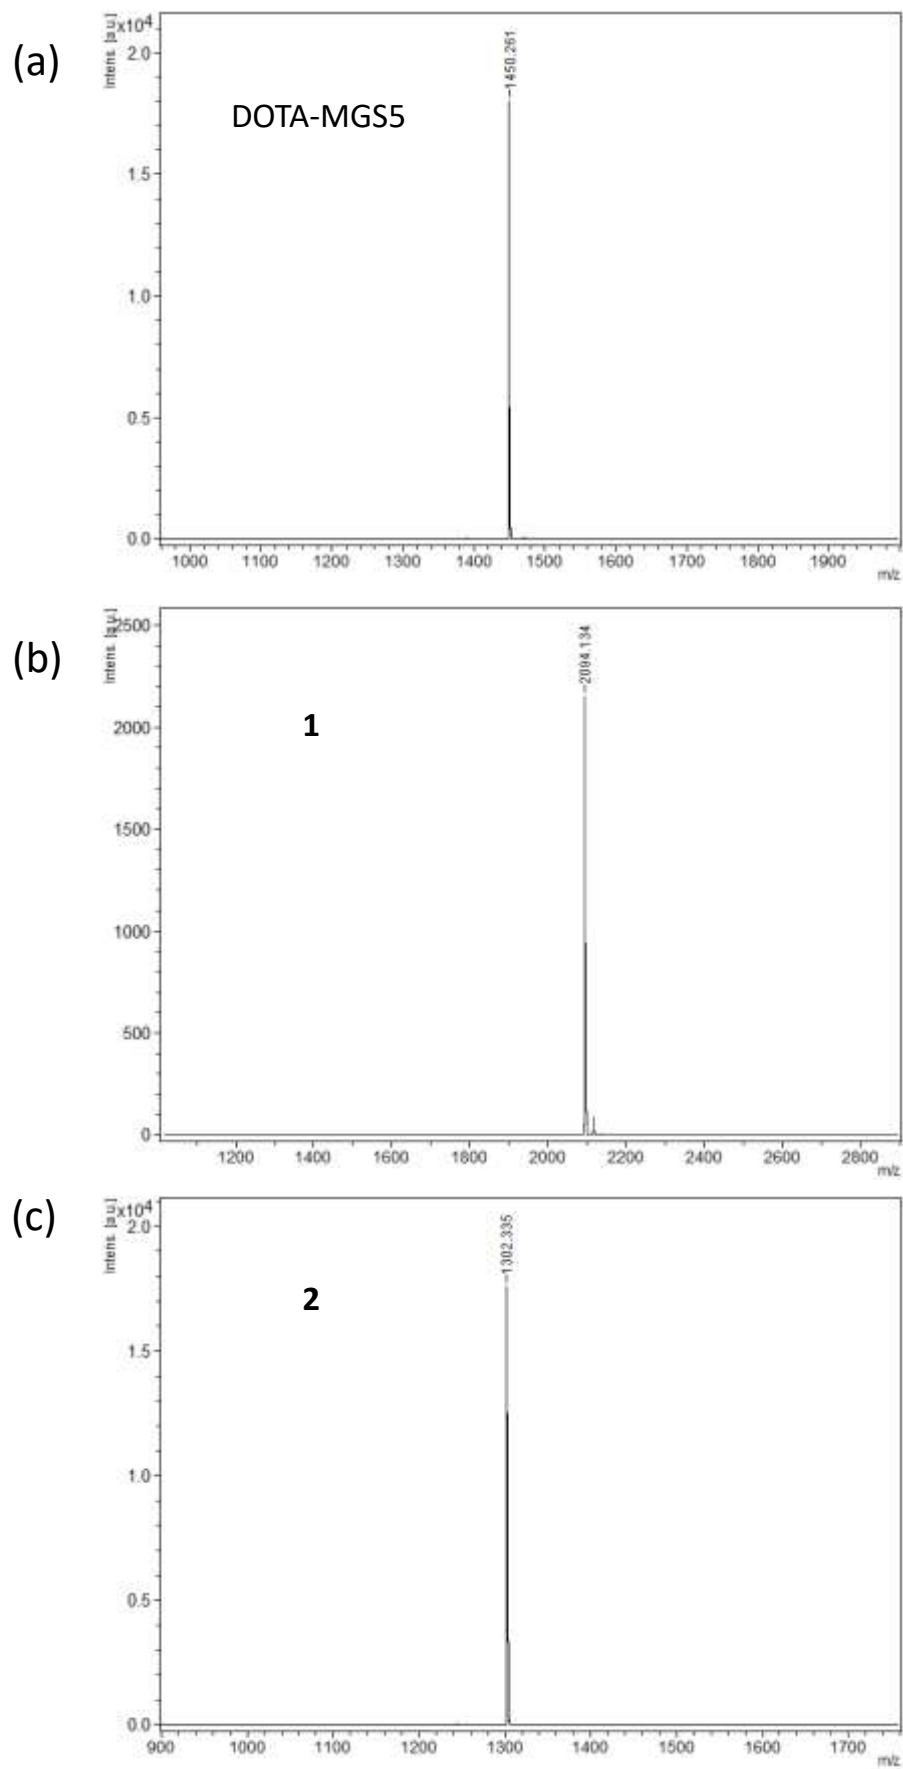

**Figure S2.** Mass spectra of (a) DOTA-MGS5, (b) **1** and (c) **2** after HPLC purification

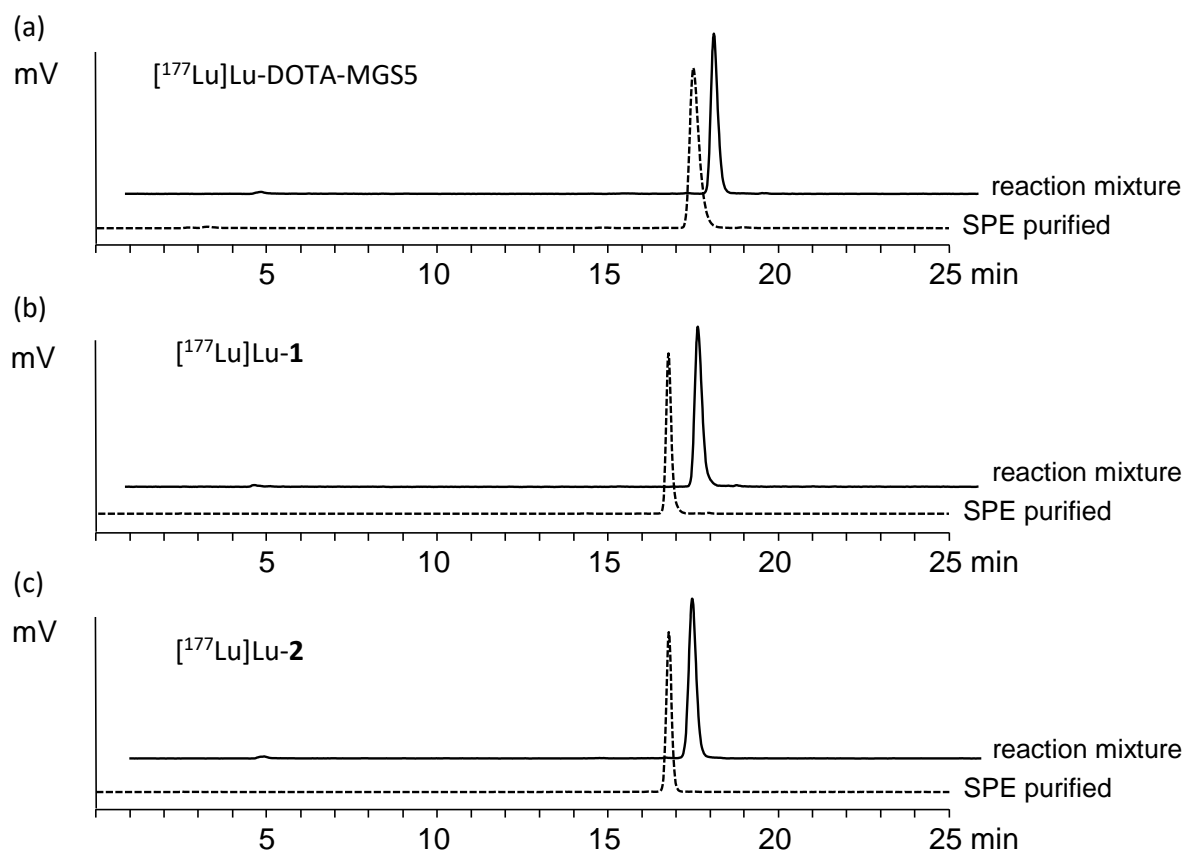

**Figure S3.** Radiochromatograms of  $^{177}\text{Lu}$ -labeled (a) DOTA-MGS5, (b) **1** and (c) **2**: reaction mixture after radiolabeling with minor presence ( $\leq 2\%$ ) of free lutetium-177 (solid line) and after removal of hydrophilic impurities by solid phase extraction (dashed line), respectively.

**Table S1.** Results of biodistribution studies evaluated in A431-CCK2R/A431-mock xenografted BALB/c nude mice of the  $^{177}\text{Lu}$ -labeled peptide derivatives (~0.5 MBq, 20 pmol, 4 h p.i.). Values expressed as percentage of injected activity per gram tissue (% IA/g); mean  $\pm$  SD (n=5).

| radiopeptide      | $^{177}\text{Lu}$ Lu-DOTA-MGS5 | $^{177}\text{Lu}$ Lu-1 | $^{177}\text{Lu}$ Lu-2 |
|-------------------|--------------------------------|------------------------|------------------------|
| <b>blood</b>      | 0.11 $\pm$ 0.11                | 0.02 $\pm$ 0.00        | 0.03 $\pm$ 0.01        |
| <b>lung</b>       | 0.17 $\pm$ 0.14                | 0.12 $\pm$ 0.04        | 0.22 $\pm$ 0.06        |
| <b>heart</b>      | 0.10 $\pm$ 0.06                | 0.06 $\pm$ 0.01        | 0.07 $\pm$ 0.02        |
| <b>femur</b>      | 0.36 $\pm$ 0.35                | 0.21 $\pm$ 0.05        | 0.22 $\pm$ 0.15        |
| <b>muscle</b>     | 0.10 $\pm$ 0.02                | 0.04 $\pm$ 0.02        | 0.06 $\pm$ 0.03        |
| <b>spleen</b>     | 0.27 $\pm$ 0.18                | 1.86 $\pm$ 0.62        | 0.96 $\pm$ 0.30        |
| <b>intestine</b>  | 1.02 $\pm$ 0.23                | 0.42 $\pm$ 0.07        | 0.60 $\pm$ 0.12        |
| <b>liver</b>      | 1.02 $\pm$ 0.80                | 2.48 $\pm$ 0.39        | 1.43 $\pm$ 0.18        |
| <b>kidneys</b>    | 3.45 $\pm$ 0.91                | 21.60 $\pm$ 2.11       | 1.96 $\pm$ 0.29        |
| <b>stomach</b>    | 6.26 $\pm$ 4.28                | 4.77 $\pm$ 1.10        | 4.30 $\pm$ 0.95        |
| <b>pancreas</b>   | 1.91 $\pm$ 0.91                | 1.25 $\pm$ 0.27        | 0.72 $\pm$ 0.14        |
| <b>A431-CCK2R</b> | 22.8 $\pm$ 4.67                | 22.18 $\pm$ 6.23       | 32.10 $\pm$ 4.05       |
| <b>A431-mock</b>  | 0.19 $\pm$ 0.03                | 0.14 $\pm$ 0.04        | 0.22 $\pm$ 0.06        |

**Table S2.** Results of the additional biodistribution study with 1000-fold excess of non-radiolabeled peptide (blocking experiment) in A431-CCK2R/A431-mock xenografted BALB/c nude mice of the  $^{177}\text{Lu}$ -labeled peptide derivatives (~0.5 MBq, 20 pmol, 4 h p.i.). Values expressed as percentage of injected activity per gram tissue (% IA/g; n=1).

| radiopeptide      | $^{177}\text{Lu}$ Lu-DOTA-MGS5 | $^{177}\text{Lu}$ Lu-1 | $^{177}\text{Lu}$ Lu-2 |
|-------------------|--------------------------------|------------------------|------------------------|
| <b>blood</b>      | 0.09                           | 0.03                   | 0.02                   |
| <b>lung</b>       | 0.08                           | 0.06                   | 0.20                   |
| <b>heart</b>      | 0.08                           | 0.05                   | 0.04                   |
| <b>femur</b>      | 0.04                           | 0.18                   | 0.09                   |
| <b>muscle</b>     | 0.03                           | 0.02                   | 0.04                   |
| <b>spleen</b>     | 0.16                           | 1.13                   | 0.70                   |
| <b>intestine</b>  | 0.79                           | 0.17                   | 0.45                   |
| <b>liver</b>      | 0.54                           | 2.86                   | 1.13                   |
| <b>kidneys</b>    | 2.95                           | 9.21                   | 1.47                   |
| <b>stomach</b>    | 0.09                           | 0.06                   | 0.09                   |
| <b>pancreas</b>   | 0.11                           | 0.05                   | 0.05                   |
| <b>A431-CCK2R</b> | 0.54                           | 0.45                   | 0.39                   |
| <b>A431-mock</b>  | 0.34                           | 0.12                   | 0.16                   |

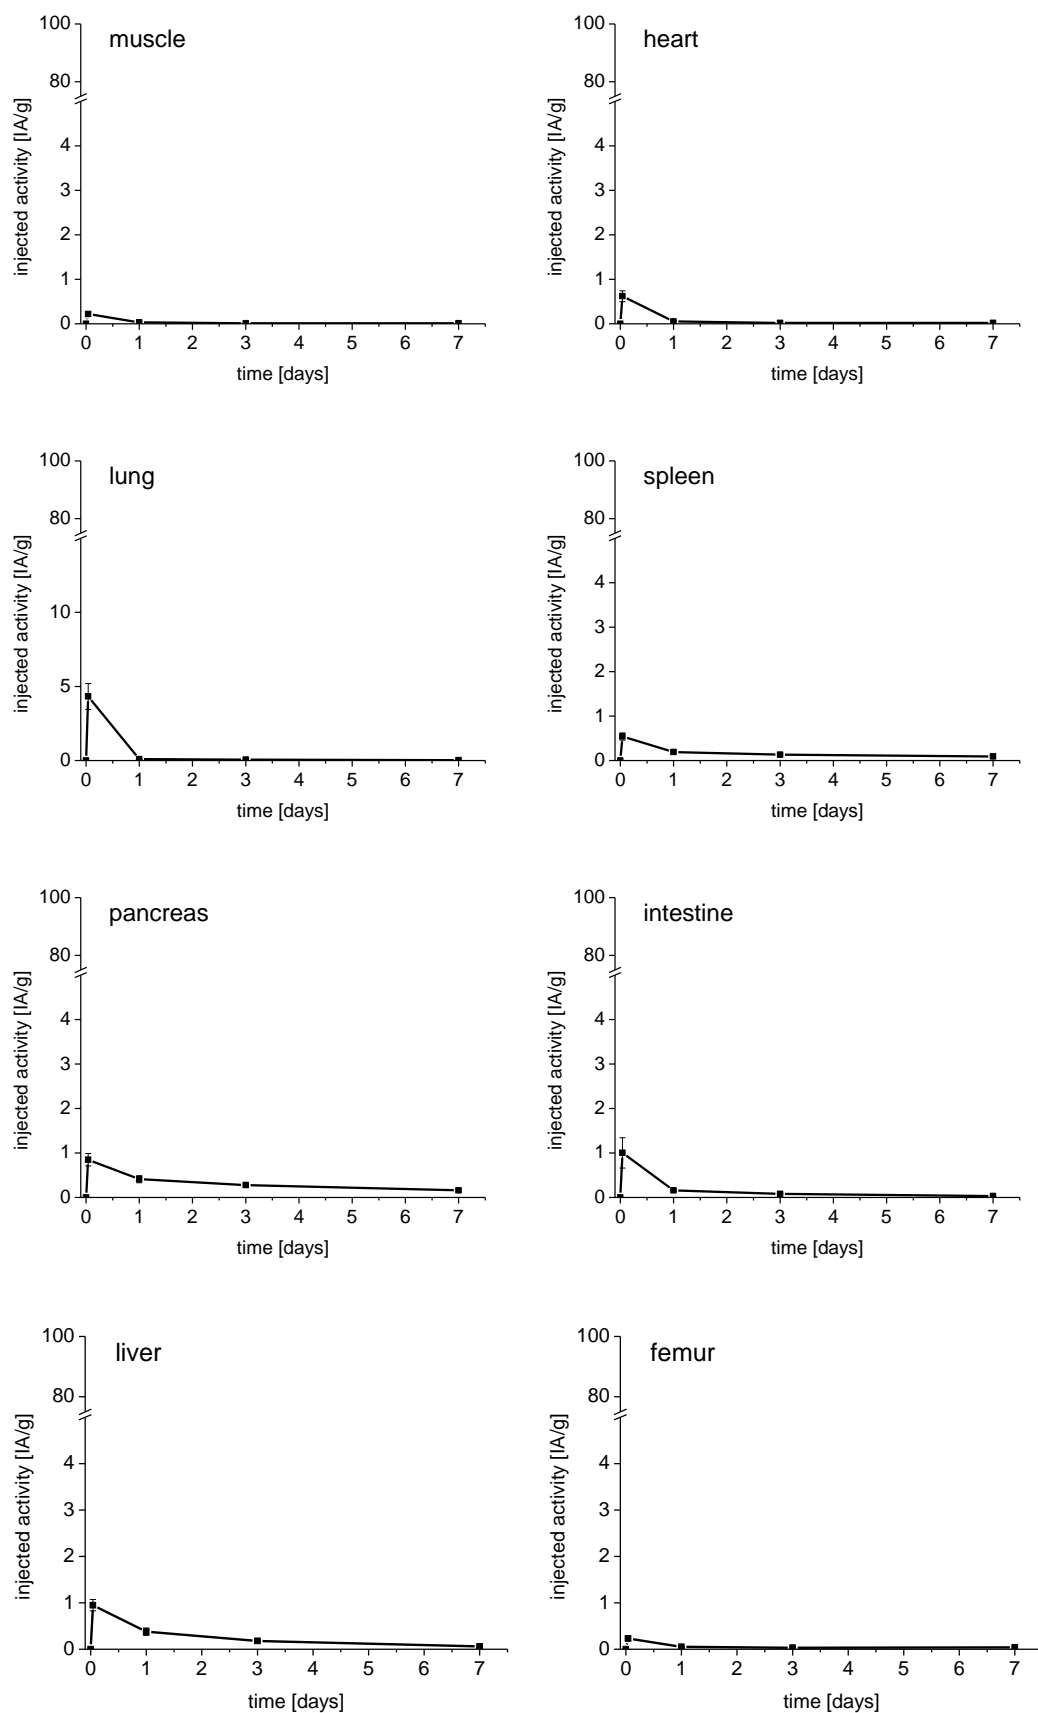

**Figure S3.** Uptake of [ $^{177}\text{Lu}$ ]Lu-2 in different tissues dissected from A431-CCK2R xenografted BALB/c nude mice for up to 7 days after injection (n=5).

**Table S3.** Uptake values of [<sup>177</sup>Lu]Lu-2 in A431-CCK2R tumor xenograft for up to 7 days after injection (n=5).

| <b>Timepoint p.i.</b> | <b>1 h</b>      | <b>24 h</b>     | <b>3 days</b>   | <b>7 days</b>   |
|-----------------------|-----------------|-----------------|-----------------|-----------------|
|                       | <b>[% IA/g]</b> | <b>[% IA/g]</b> | <b>[% IA/g]</b> | <b>[% IA/g]</b> |
| <b>blood</b>          | 1.45±0.30       | 0.01±0.00       | 0.00±0.00       | 0.01±0.00       |
| <b>lung</b>           | 4.33±0.87       | 0.09±0.02       | 0.06±0.01       | 0.02±0.01       |
| <b>heart</b>          | 0.62±0.12       | 0.05±0.01       | 0.02±0.00       | 0.02±0.00       |
| <b>femur</b>          | 0.23±0.05       | 0.05±0.01       | 0.03±0.01       | 0.04±0.02       |
| <b>muscle</b>         | 0.22±0.05       | 0.03±0.00       | 0.01±0.00       | 0.01±0.01       |
| <b>spleen</b>         | 0.54±0.08       | 0.19±0.03       | 0.13±0.02       | 0.09±0.04       |
| <b>intestine</b>      | 1.00±0.34       | 0.16±0.02       | 0.08±0.00       | 0.03±0.00       |
| <b>liver</b>          | 0.95±0.12       | 0.38±0.08       | 0.18±0.01       | 0.06±0.01       |
| <b>kidneys</b>        | 2.84±0.42       | 1.32±0.23       | 0.72±0.10       | 0.31±0.03       |
| <b>stomach</b>        | 5.43±1.05       | 3.66±0.38       | 2.28±0.33       | 0.88±0.12       |
| <b>pancreas</b>       | 0.85±0.14       | 0.41±0.08       | 0.28±0.04       | 0.16±0.04       |
| <b>A431-CCK2R</b>     | 56.29±9.14      | 33.61±2.95      | 12.52±0.96      | 1.23±0.53       |
